# Supplementary material for: Secure genome-wide association analysis using multiparty computation
Source: Springer Nature journal article supplement (doi:10.1038/nbt.4108), 2018-05-07
Supplement: 41587_2018_BFnbt4108_MOESM45_ESM.pdf [file 41587_2018_BFnbt4108_MOESM45_ESM.pdf]

| dbSNP ID   | Genomic position | Cochran-Armitage statistic |              | Secure GWAS                |
|------------|------------------|----------------------------|--------------|----------------------------|
|            |                  | Secure GWAS                | Ground truth | <i>p</i> -value (adjusted) |
| rs2736100  | chr5:1339516     | 0.011944                   | 0.012012     | 7.99E-20                   |
| rs7086803  | chr10:114488466  | 0.007988                   | 0.007956     | 6.16E-12                   |
| rs7916159  | chr10:114490367  | 0.007883                   | 0.007871     | 9.99E-12                   |
| rs7911081  | chr10:114458809  | 0.007066                   | 0.007050     | 4.32E-10                   |
| rs3802554  | chr10:114455760  | 0.006509                   | 0.006507     | 5.63E-09                   |
| rs7090942  | chr10:114464924  | 0.006027                   | 0.006045     | 5.21E-08                   |
| rs11196072 | chr10:114466456  | 0.005790                   | 0.005834     | 1.56E-07                   |
| rs7088500  | chr10:114448959  | 0.005568                   | 0.005524     | 4.36E-07                   |
| rs4600802  | chr3:190866124   | 0.003855                   | 0.003920     | 1.24E-03                   |
| rs6790258  | chr3:190826843   | 0.003532                   | 0.003558     | 5.61E-03                   |
| rs4867308  | chr5:31150347    | 0.003424                   | 0.003406     | 9.30E-03                   |
| rs1038273  | chr3:100269291   | 0.003421                   | 0.003435     | 9.44E-03                   |
| rs1404100  | chr3:100273457   | 0.003356                   | 0.003353     | 1.28E-02                   |
| rs331385   | chr5:91085207    | 0.003352                   | 0.003559     | 1.30E-02                   |
| rs1022907  | chr10:114384784  | 0.003039                   | 0.003034     | 5.65E-02                   |
| rs6791928  | chr3:29434543    | 0.002926                   | 0.002942     | 9.60E-02                   |
| rs6881283  | chr5:91091413    | 0.002912                   | 0.002952     | 1.03E-01                   |
| rs2968019  | chr5:58380905    | 0.002898                   | 0.002888     | 1.10E-01                   |
| rs6774934  | chr3:190864951   | 0.002873                   | 0.002883     | 1.23E-01                   |
| rs331403   | chr5:91073284    | 0.002861                   | 0.002897     | 1.30E-01                   |

**Supplementary Table 1: Top 20 associations obtained by our secure GWAS protocol on lung cancer data set.** Using our protocol, we securely performed GWAS on a published lung cancer data set including 378,492 SNPs over 9,098 individuals after quality control. The Cochran-Armitage trend test statistics securely computed by our protocol are compared to the ground truth computed in plaintext for top 20 associations. Reported *p*-values (one-sided) are based on our secure GWAS results and are adjusted for multiple hypothesis testing via Bonferroni correction.

| dbSNP ID   | Genomic position | Cochran-Armitage statistic |              | Secure GWAS                |
|------------|------------------|----------------------------|--------------|----------------------------|
|            |                  | Secure GWAS                | Ground truth | <i>p</i> -value (adjusted) |
| rs4862110  | chr4:183988023   | 0.014025                   | 0.014486     | 8.79E-29                   |
| rs11245742 | chr11:50478883   | 0.010311                   | 0.011011     | 4.04E-20                   |
| rs1569899  | chr14:36823161   | 0.009348                   | 0.009356     | 7.15E-18                   |
| rs3856803  | chr3:11648402    | 0.009202                   | 0.009213     | 1.57E-17                   |
| rs829404   | chr1:21856198    | 0.009143                   | 0.009266     | 2.16E-17                   |
| rs1840812  | chr19:33466407   | 0.009066                   | 0.009108     | 3.27E-17                   |
| rs256938   | chr5:114896236   | 0.008796                   | 0.008724     | 1.40E-16                   |
| rs4742988  | chr9:107935510   | 0.008714                   | 0.008815     | 2.17E-16                   |
| rs7988924  | chr13:99386211   | 0.008701                   | 0.008767     | 2.33E-16                   |
| rs946577   | chr1:155352755   | 0.008685                   | 0.008538     | 2.54E-16                   |
| rs4736520  | chr8:131718210   | 0.008588                   | 0.008662     | 4.29E-16                   |
| rs1344     | chr1:145585897   | 0.008578                   | 0.008604     | 4.53E-16                   |
| rs12306932 | chr12:36528296   | 0.008577                   | 0.010201     | 4.55E-16                   |
| rs853943   | chr10:120154241  | 0.008517                   | 0.008587     | 6.27E-16                   |
| rs913357   | chr9:88362302    | 0.008512                   | 0.008522     | 6.45E-16                   |
| rs1515219  | chr2:11286529    | 0.008504                   | 0.008507     | 6.72E-16                   |
| rs6949235  | chr7:138598718   | 0.008478                   | 0.008477     | 7.76E-16                   |
| rs921322   | chr2:11237111    | 0.008466                   | 0.008438     | 8.28E-16                   |
| rs8996     | chr2:11238328    | 0.008445                   | 0.008414     | 9.25E-16                   |
| rs7642848  | chr3:191110766   | 0.008426                   | 0.008483     | 1.03E-15                   |

**Supplementary Table 2: Top 20 associations obtained by our secure GWAS protocol on bladder cancer data set.** Using our protocol, we securely performed GWAS on a published bladder cancer data set including 389,868 SNPs over 10,678 individuals after quality control. The Cochran-Armitage trend test statistics securely computed by our protocol are compared to the ground truth computed in plaintext for top 20 associations. Reported *p*-values (one-sided) are based on our secure GWAS results and are adjusted for multiple hypothesis testing via Bonferroni correction.

| dbSNP ID   | Genomic position | Cochran-Armitage statistic |              | Secure GWAS                |
|------------|------------------|----------------------------|--------------|----------------------------|
|            |                  | Secure GWAS                | Ground truth | <i>p</i> -value (adjusted) |
| rs3750847  | chr10:124215421  | 0.092962                   | 0.092970     | <1E-300                    |
| rs36212732 | chr10:124215198  | 0.092777                   | 0.092819     | <1E-300                    |
| rs10490924 | chr10:124214448  | 0.092268                   | 0.092593     | <1E-300                    |
| rs3793917  | chr10:124219275  | 0.090600                   | 0.090786     | <1E-300                    |
| rs11200638 | chr10:124220544  | 0.088566                   | 0.088700     | <1E-300                    |
| rs11200643 | chr10:124229203  | 0.080014                   | 0.080019     | <1E-300                    |
| rs3766405  | chr1:196695161   | 0.074405                   | 0.074400     | <1E-300                    |
| rs1410996  | chr1:196696933   | 0.074360                   | 0.074368     | <1E-300                    |
| rs7540032  | chr1:196701284   | 0.074269                   | 0.074390     | <1E-300                    |
| rs2274700  | chr1:196682947   | 0.074231                   | 0.074231     | <1E-300                    |
| rs1329428  | chr1:196702810   | 0.074107                   | 0.074148     | <1E-300                    |
| rs10737680 | chr1:196679455   | 0.074068                   | 0.074253     | <1E-300                    |
| rs12038333 | chr1:196672454   | 0.072452                   | 0.072441     | <1E-300                    |
| rs1329424  | chr1:196646176   | 0.072263                   | 0.072328     | <1E-300                    |
| rs572515   | chr1:196646261   | 0.071822                   | 0.072830     | <1E-300                    |
| rs393955   | chr1:196692470   | 0.071253                   | 0.071265     | <1E-300                    |
| rs395544   | chr1:196698272   | 0.071207                   | 0.071196     | <1E-300                    |
| rs380390   | chr1:196701051   | 0.070820                   | 0.071235     | <1E-300                    |
| rs1061147  | chr1:196654324   | 0.070753                   | 0.071978     | <1E-300                    |
| rs203679   | chr1:196682518   | 0.070610                   | 0.070944     | <1E-300                    |

**Supplementary Table 3: Top 20 associations obtained by our secure GWAS protocol on AMD data set.** Using our protocol, we securely performed GWAS on a published AMD data set including 221,295 SNPs over 20,679 individuals after quality control. The Cochran-Armitage trend test statistics securely computed by our protocol are compared to the ground truth computed in plaintext for top 20 associations. Reported *p*-values (one-sided) are based on our secure GWAS results and are adjusted for multiple hypothesis testing via Bonferroni correction. All *p*-values shown were smaller than machine precision and thus could not be precisely determined.
